# Supplementary material for: Investigation of the Genotoxic Potential of the Marine Toxin C17-SAMT Using the In Vivo Comet and Micronucleus Assays
Source: MDPI journal article supplement (doi:10.3390/md20100619), 2022-09-30
Supplement: s1 [file s1]

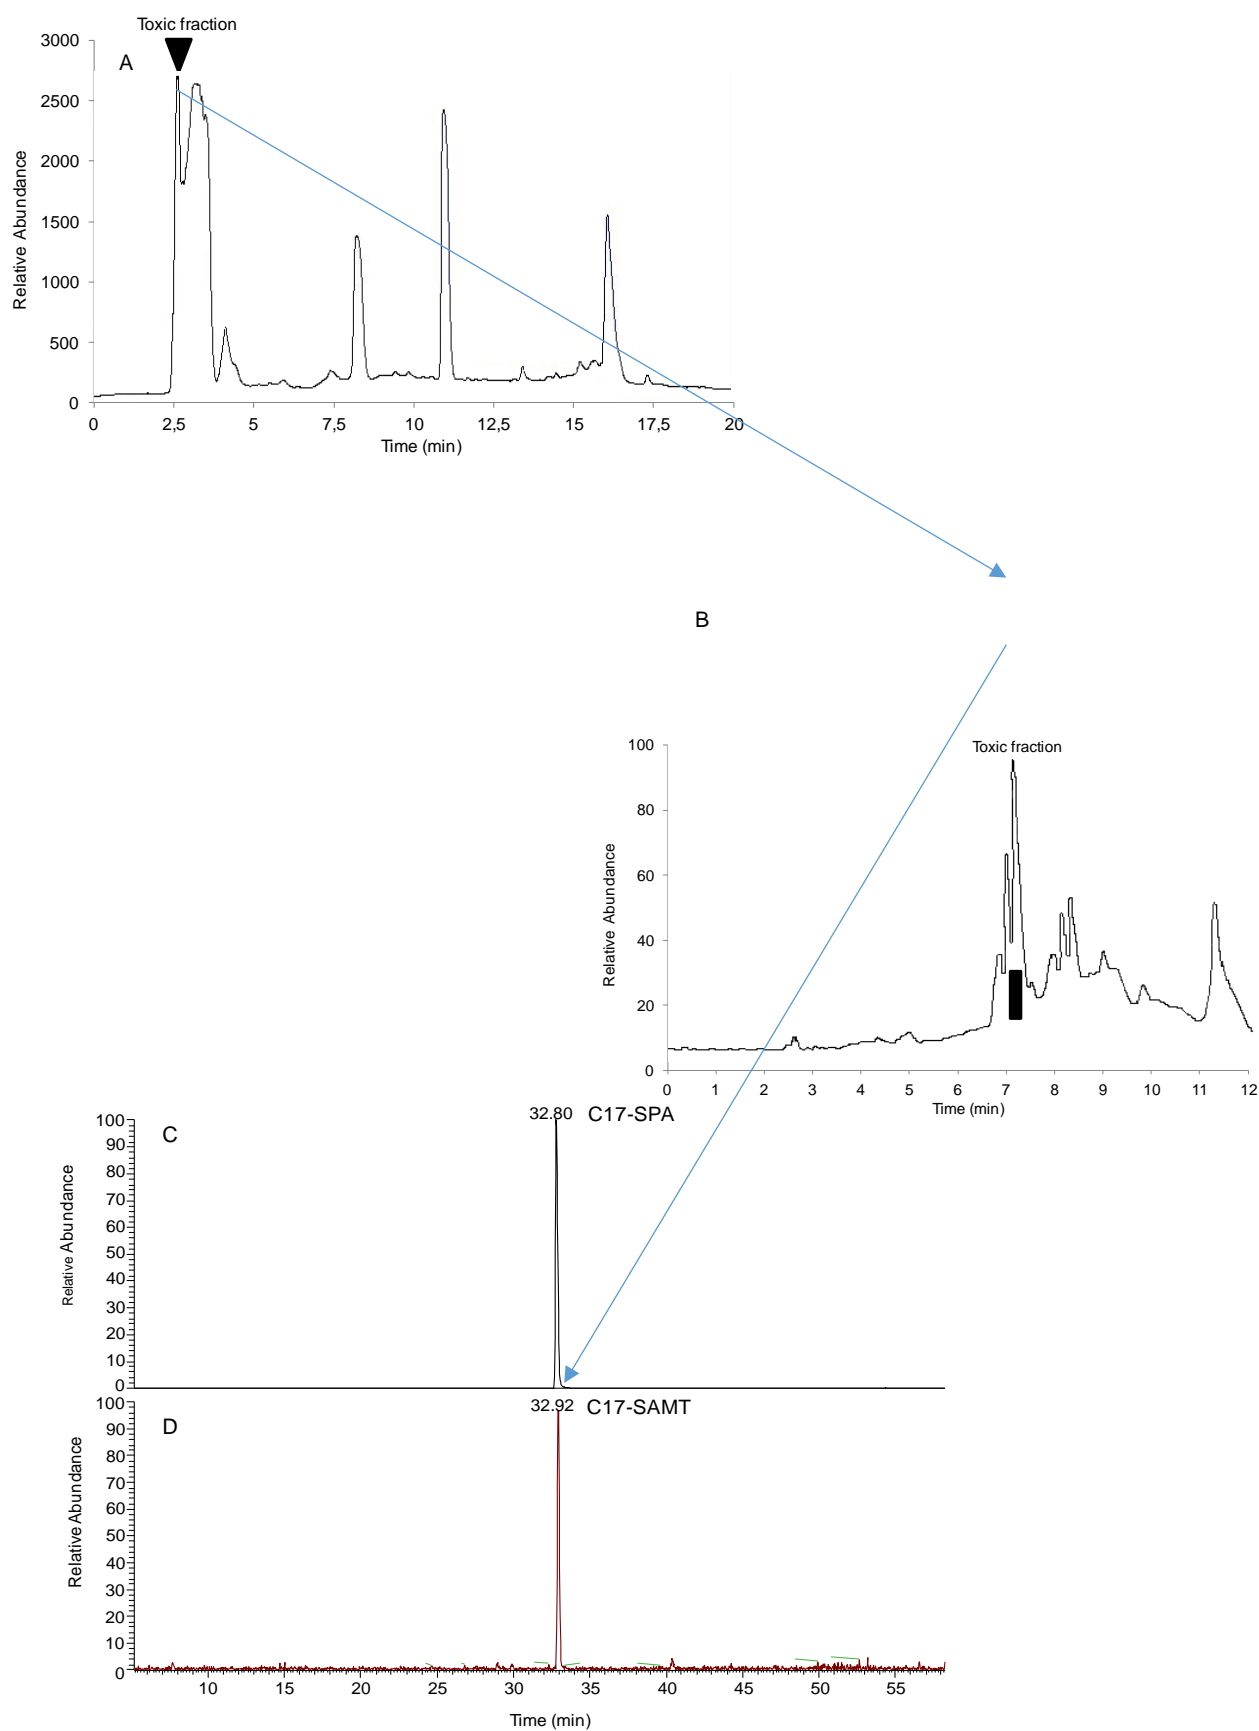

**Figure S1:** chromatograms of: (A) the water-soluble extract, which possessed the entire toxic activity, (B) the purified toxic fraction, and (C,D) the C-17 SAMT and the certified standard D-erythro-sphinganine (C17-SPA) co-eluted.
